# Supplementary material for: Rational design of a fluorescent poly(N-aryleneindole ether sulfone) switch by cation–π interactions
Source: Royal Society of Chemistry journal article supplement (doi:10.1039/c4py01472c), 2014-11-19

## ***Supporting Information***

### **Rational Design of A Fluorescent Poly(*N*-aryleneindole ether sulfone) Switch by Cation– $\pi$ Interactions**

*Guanjun Chang,<sup>\*a</sup> Li Yang,<sup>a</sup> Shenye Liu,<sup>b</sup> Runxiong Lin<sup>c</sup> and Jingsong You<sup>d</sup>*

<sup>a</sup> State Key Laboratory Cultivation Base for Nonmetal Composite and Functional Materials & School of Material Science and Engineering, Southwest University of Science and Technology, Mianyang, 621010, P R China.

<sup>b</sup> Research Center of Laser Fusion, China Academy of Engineering Physics, Mianyang, 621900, P R China.

<sup>c</sup> Engineering Research Center of High Performance Polymer and Molding Technology, Ministry of Education, Qingdao University of Science and Technology, Qingdao, 266042, P R China.

<sup>d</sup> Key Laboratory of Green Chemistry and Technology of Ministry of Education, College of Chemistry, Sichuan University, 29 Wangjiang Road, Chengdu, 610064, P R China.

*Tel:* +86-13990158034; *E-mail:* gjchang@mail.ustc.edu.cn

## Table of contents

|                                                                                                                                                                       |     |
|-----------------------------------------------------------------------------------------------------------------------------------------------------------------------|-----|
| I. General remarks of optical spectroscopic studies.....                                                                                                              | S3  |
| II. Synthesis of poly( <i>N</i> -aryleneindole ether sulfone) sensor ( <b>PESIN</b> ).....                                                                            | S4  |
| III. Binding studies of <b>PESIN</b> with pyridine hydrochloride and quinoline hydrochloride.....                                                                     | S5  |
| IV. Binding studies of <b>PESIN</b> with pyridine, triethylamine hydrochloride and hydrochloride.....                                                                 | S7  |
| V. Optimized geometries of <b>PESIN</b> solution with pyridine hydrochloride (Py·HCl).....                                                                            | S8  |
| VI. Binding studies of <b>PESIN</b> with pyridine hydrochloride (Py·HCl), pyridine hydrobromide (Py·HBr), pyridine sulfate (Py·H <sub>2</sub> SO <sub>4</sub> ) ..... | S9  |
| VII. Calculation of the detection limit.....                                                                                                                          | S10 |
| VIII. IR spectra of <b>PESIN</b> .....                                                                                                                                | S11 |
| IX. Copy of <sup>1</sup> H NMR spectra of <b>PESIN</b> .....                                                                                                          | S12 |

## I. General remarks of optical spectroscopic studies

The studies on the binding properties of **PESIN** were carried out in *N,N*-dimethylformamide (DMF)/H<sub>2</sub>O (99:1, v/v). A variety of aromatic heterocyclic hydrochlorides including pyridine hydrochloride (Py·HCl), pyridine hydrobromide (Py·HBr), pyridine sulfate (Py·H<sub>2</sub>SO<sub>4</sub>), quinoline hydrochloride (Qu·HCl), imidazole hydrochloride (IM·HCl) and benzimidazole hydrochloride (BIM·HCl) were also dissolved in aqueous solutions (v/v, DMF/H<sub>2</sub>O = 99:1). Sodium hydroxide and triethylamine hydrochloride were both dissolved in water. DMF was either HPLC or spectroscopic grade and water was distilled for twice. All solutions were prepared using volumetric syringes, pipettes, and volumetric flasks. The stock solutions of fluorophores and analytes were freshly prepared and used for each measurement. Each time a 3 mL of receptor was filled in a quartz cell of 1 cm of optical path length, and the stock solution of hydrochloride was added into a quartz cell dropwise using a micro-syringe. The volume of analyte stock solution added was less than 100  $\mu$ L to remain the concentration of receptor unchanged. Absorption spectra were detected on a SHIMADZU UV-3150 uv-vis-NIR spectrophotometer. Fluorescent emission spectra were collected on a PerkinElmer LS-55 fluorescence spectrometer.

## II. Synthesis of poly(*N*-aryleneindole ether sulfone) sensor (PESIN)

To a three-necked flask (25 mL) equipped with magnetic stirrer, an argon outlet, inlet, and water-cooled condenser, 4-hydroxyindole (4.0 mmol), 4,4'-difluorodiphenyl sulfone (4.0 mmol), K<sub>2</sub>CO<sub>3</sub> (8 mmol), and NMP (10.0 mL) were added. The reaction mixture was evacuated and flushed with high-purity argon. This procedure was repeated three times. The reaction mixture was heated to 160 °C under stirring for 2h, and then the temperature was subsequently brought to 190 °C and maintained at this temperature for 3h. The resulting polymer solution was allowed to slowly cool to room temperature, and subsequently poured into cold water, filtered, washed with water and methanol, and then dried at 100 °C under vacuum (yield 96%). FT-IR spectrum (KBr pellet, cm<sup>-1</sup>): 3094, 1685, 1592, 1519, 1321, 1247, 752; <sup>1</sup>H NMR (600 MHz, DMSO-*d*<sub>6</sub>): δ = 6.46 (s, 1H), 6.89 (s, 1H), 7.09 (d, *J* = 20.4 Hz, 2H), 7.23 (s, 1H), 7.55 (s, 1H), 7.69 (s, 1H), 7.84 (m, 6H) ppm; Anal.Calcd for (C<sub>20</sub>H<sub>13</sub>NO<sub>3</sub>S)<sub>n</sub> (347.39)<sub>n</sub>: C, 69.15; H, 3.77; N, 4.03; Found: C, 68.96; H, 3.80; N, 4.00.

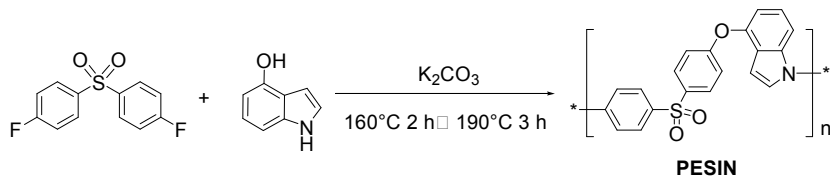

**Scheme S1.** Synthesis of **PESIN** via C–N/C–O coupling reaction.

### III. Binding studies of PESIN with pyridine hydrochloride and quinoline hydrochloride

The apparent association constant  $K$  is determined by the nonlinear curve fitting method<sup>1</sup> (eqn. (1)).  $C_H$  and  $C_G$  are the concentrations of sensor **PESIN** and pyridine hydrochloride (Py·HCl) or quinoline hydrochloride (Qu·HCl), respectively.  $F_0$  is the fluorescence intensity of **PESIN** before the addition of hydrochlorides.  $F_{\text{lim}}$  is the lowest value that the fluorescence intensity can reach after the addition of hydrochlorides and can be left as a floating parameter in the analysis if it cannot be determined accurately.  $K$  can thus be obtained by the nonlinear least squares analysis of  $F_{\text{cal}}$  versus  $C_G$ .

$$F = F_0 + \frac{F_{\text{lim}} - F_0}{2} \left\{ 1 + \frac{C_G}{C_H} + \frac{1}{KC_H} - \left[ \left( 1 + \frac{C_G}{C_H} + \frac{1}{KC_H} \right)^2 - 4 \frac{C_G}{C_H} \right]^{1/2} \right\} \quad (1)$$

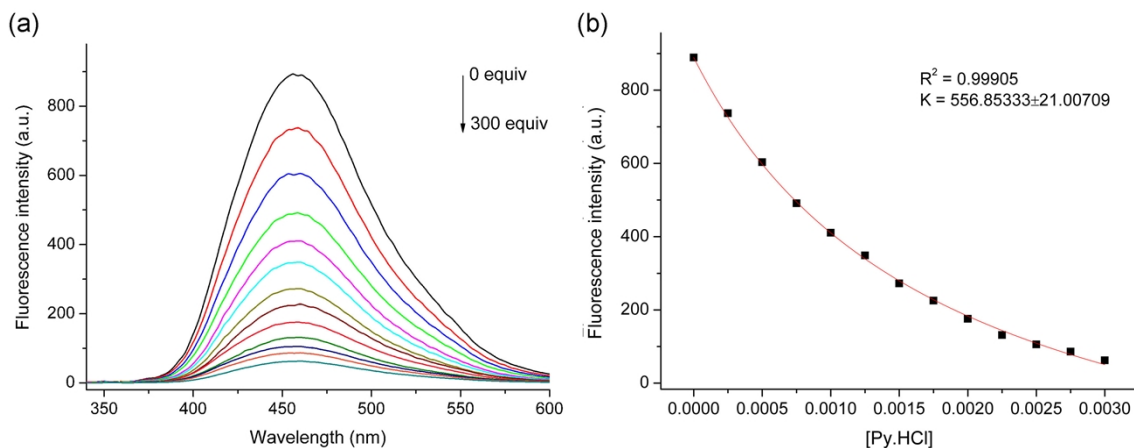

$$K = (5.57 \pm 0.21) \times 10^2 \text{ M}^{-1}$$

**Figure S1.** (a) Fluorescent titration spectra of **PESIN** (10  $\mu\text{M}$ ) upon addition of pyridine hydrochloride in 99:1 (v/v) of DMF/H<sub>2</sub>O ( $\lambda_{\text{exc}}$  = 320 nm, slits = 5.0 nm, 3.5 nm). (b) The association constant  $K$  obtained by nonlinear curve fitting at the emission of 458 nm.

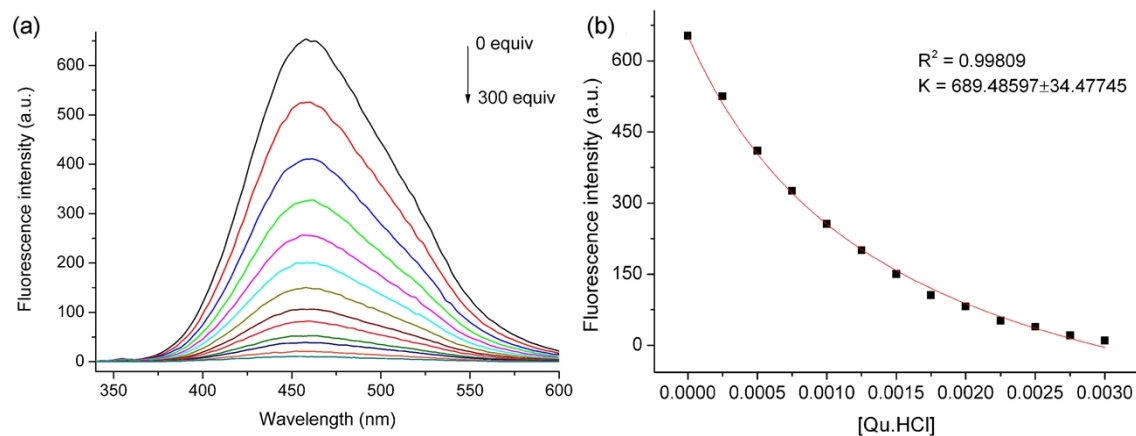

$$K = (6.89 \pm 0.34) \times 10^2 \text{ M}^{-1}$$

**Figure S2.** (a) Fluorescent titration spectra of **PESIN** (10  $\mu\text{M}$ ) upon addition of quinoline hydrochloride in 99:1 (v/v) of DMF/H<sub>2</sub>O ( $\lambda_{\text{exc}}$  = 320 nm, slits = 5.0 nm, 3.5 nm). (b) The association constant  $K$  obtained by nonlinear curve fitting at the emission of 458 nm.

#### Reference:

1. a) D. K. Ryan, J. H. Weber, *Anal. Chem.* **1982**, *54*, 986-990; b) B. Valeur, J. Pouget, J. Bouson, M. Kaschke, N. P. Ernsting, *J. Phys. Chem.* **1992**, *96*, 6545-6549; c) R.-H. Yang, K.-A. Li, K.-M. Wang, F.-L. Zhao, N. Li, F. Liu, *Anal. Chem.* **2003**, *75*, 612-621.

#### IV. Binding studies of PESIN with pyridine, triethylamine hydrochloride and hydrochloride

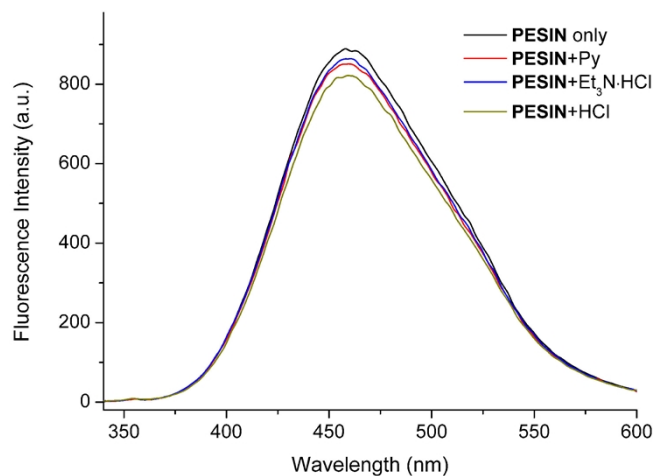

**Figure S3.** Fluorescence spectra of **PESIN** (10 μM) upon addition of 300 equiv of pyridine, triethylamine hydrochloride and hydrochloride, respectively, in 99:1 (v/v) of DMF/H<sub>2</sub>O, excited at 320 nm.

**V. Optimized geometries of PESIN solution with pyridine hydrochloride  
(Py·HCl)**

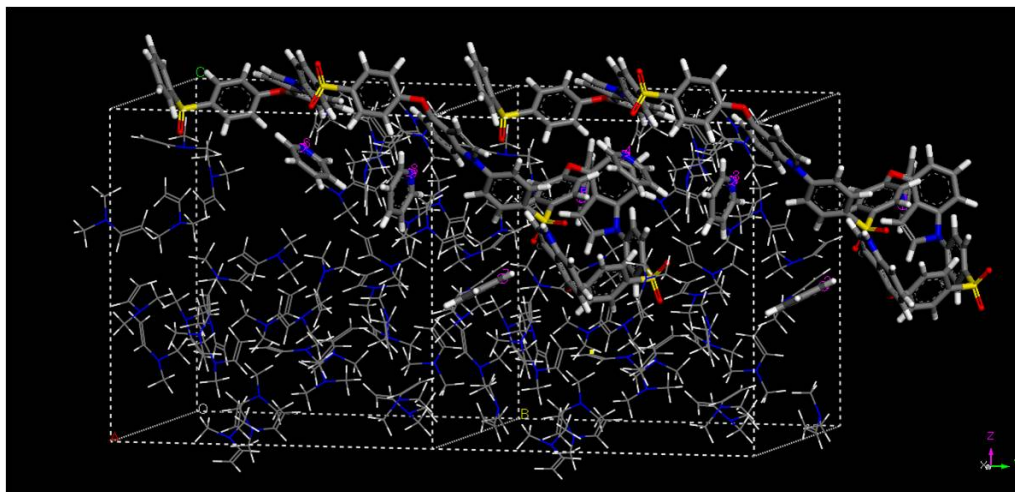

**Figure S4.** Polymer solution (**PESIN**, pyridine hydrochloride and DMF) after structure and energy optimization.

**VI. Binding studies of PESIN with pyridine hydrochloride (Py·HCl), pyridine hydrobromide (Py·HBr), pyridine sulfate (Py·H<sub>2</sub>SO<sub>4</sub>)**

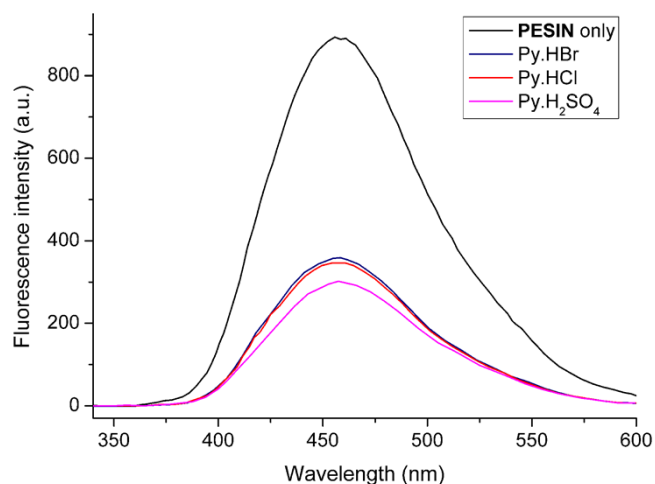

**Figure S5.** Fluorescence spectra of **PESIN** (10  $\mu$ M) upon addition of 125 equiv of pyridine hydrochloride (Py·HCl), pyridine hydrobromide (Py·HBr) and pyridine sulfate (Py·H<sub>2</sub>SO<sub>4</sub>), respectively, in 99:1 (v/v) of DMF/H<sub>2</sub>O, excited at 320 nm.

## VII. Calculation of the detection limit

The typical limit of detection (LOD) is obtained by using the equation followed:

$$LOD = \frac{3 \times SD}{S}$$

Where SD is the standard deviation of the background (blank **PESIN**) and S is the sensitivity. S can be obtained from the slope of the linear fit.

### VIII. IR spectra of PESIN

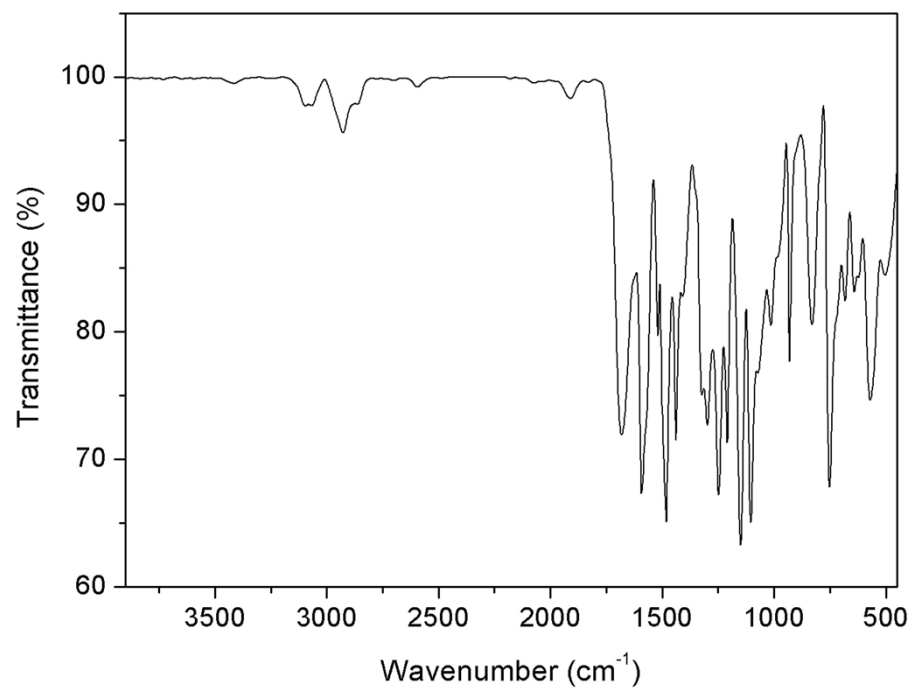

**Figure S6.** The IR spectrum of polymer **PESIN**.

## IX. Copy of $^1\text{H}$ NMR spectra of PESIN

NMR Dai Yatang  
 $^1\text{H}$  NMR  
 sample: #3  
 Name: Shang Cong  
 Temp: 298.2K  
 Solvent: DMSO  
 2013-04-25

8.200 8.194 8.094 8.087 7.987 7.883 7.839 7.689 7.551 7.228 7.127 7.093 6.892 6.464

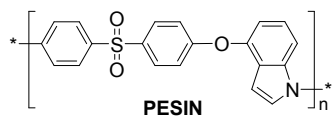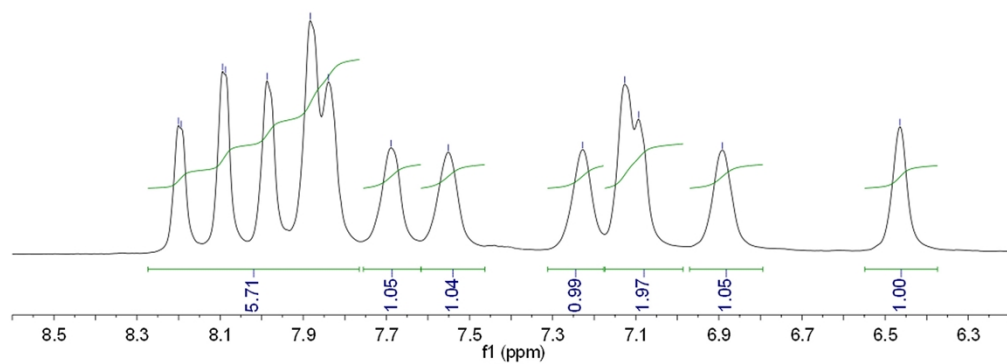

Supplement: c4py01472c1.pdf [file c4py01472c1.pdf]
